# Supplementary material for: Glycerol eutectics as sustainable solvent systems
Source: Royal Society of Chemistry journal article supplement (doi:10.1039/c0gc00395f), 2010-10-27
Supplement: c0gc00395f.pdf [file c0gc00395f.pdf]

## Glycerol Eutectics as Sustainable Solvent Systems

Andrew P. Abbott, \*<sup>a</sup> Robert C. Harris<sup>a</sup>, and Karl S. Ryder<sup>a</sup>, Carmine D'Agostino<sup>b</sup>, Lynn F. Gladden<sup>b</sup>, Mick D. Mantle<sup>b</sup>

<sup>a</sup> Chemistry Department, University of Leicester, Leicester, LE1 7RH, UK

<sup>b</sup> Department of Chemical Engineering and Biotechnology, University of Cambridge, Cambridge, CB2 3RA, UK

Fax: +44 116 252 3789 E.mail: [Andrew.abbott@le.ac.uk](mailto:Andrew.abbott@le.ac.uk)

### Supplementary Information

#### Physical Properties - Choline Chloride :Glycerol

Table S1 Raw data for Glycerol with 5% choline chloride

| T/(°C)                                   | 20    | 25    | 30    | 35   | 40   | 45   | 50   | 55   |
|------------------------------------------|-------|-------|-------|------|------|------|------|------|
| $\eta$ / (cP)                            | 998   | 654   | 450   | 314  | 222  | 163  | 120  | 90   |
| $\sigma$ / ( $\mu\text{S} / \text{cm}$ ) | 106.4 | 143.3 | 190.1 | 252  | 320  | 394  | 479  | 568  |
| $\gamma$ / (mN/m)                        | 63.7  | 62.8  | 62.0  | 61.3 | 60.5 | 59.8 | 59.3 | 58.7 |

Table S2: Raw data for Glycerol with 10% choline chloride

| T/(°C)                                   | 20   | 25   | 30   | 35   | 40   | 45   | 50   | 55   |
|------------------------------------------|------|------|------|------|------|------|------|------|
| $\eta$ / (cP)                            | 790  | 503  | 349  | 247  | 180  | 132  | 98   | 74   |
| $\sigma$ / ( $\mu\text{S} / \text{cm}$ ) | 243  | 297  | 374  | 483  | 601  | 759  | 980  | 1245 |
| $\gamma$ / (mN/m)                        | 61.6 | 61.0 | 60.3 | 59.5 | 59.0 | 58.4 | 57.9 | 57.5 |

Table S3: Raw data for Glycerol with 15% choline chloride

| T/(°C)                                   | 20   | 25   | 30   | 35   | 40   | 45   | 50   | 55   |
|------------------------------------------|------|------|------|------|------|------|------|------|
| $\eta$ / (cP)                            | 548  | 380  | 270  | 194  | 140  | 107  | 80   | 60   |
| $\sigma$ / ( $\mu\text{S} / \text{cm}$ ) | 470  | 555  | 666  | 798  | 963  | 1114 | 1403 | 1788 |
| $\gamma$ / (mN/m)                        | 60.8 | 60.2 | 59.7 | 59.1 | 58.7 | 58.1 | 57.6 | 57.3 |

Table S4: Raw data for Glycerol with 20% choline chloride

| T/(°C)                                   | 20   | 25   | 30   | 35   | 40   | 45   | 50   | 55   |
|------------------------------------------|------|------|------|------|------|------|------|------|
| $\eta$ / (cP)                            | 503  | 350  | 246  | 178  | 132  | 98   | 86   | 57   |
| $\sigma$ / ( $\mu\text{S} / \text{cm}$ ) | 580  | 739  | 930  | 1140 | 1362 | 1609 | 1923 | 2250 |
| $\gamma$ / (mN/m)                        | 57.4 | 57.0 | 56.6 | 56.1 | 55.7 | 55.2 | 54.8 | 54.4 |

**Table S5:** Raw data for Glycerol with 25% choline chloride

| <b>T/(°C)</b>                                                | <b>20</b> | <b>25</b> | <b>30</b> | <b>35</b> | <b>40</b> | <b>45</b> | <b>50</b> | <b>55</b> |
|--------------------------------------------------------------|-----------|-----------|-----------|-----------|-----------|-----------|-----------|-----------|
| <b><math>\eta</math> / (cP)</b>                              | 450       | 320       | 229       | 169       | 126       | 95        | 73        | 58        |
| <b><math>\sigma</math> / (<math>\mu\text{S}</math> / cm)</b> | 850       | 1030      | 1244      | 1490      | 1835      | 2140      | 2480      | 2930      |
| <b><math>\gamma</math>/ (mN/m)</b>                           | 50.8      | 50.3      | 49.9      | 49.3      | 48.9      | 48.4      | 48.0      | 47.6      |

**Table S6:** Raw data for Glycerol with 30% choline chloride

| <b>T/(°C)</b>                                                | <b>20</b> | <b>25</b> | <b>30</b> | <b>35</b> | <b>40</b> | <b>45</b> | <b>50</b> | <b>55</b> |
|--------------------------------------------------------------|-----------|-----------|-----------|-----------|-----------|-----------|-----------|-----------|
| <b><math>\eta</math> / (cP)</b>                              | 401       | 295       | 213       | 160       | 120       | 91        | 71        | 55        |
| <b><math>\sigma</math> / (<math>\mu\text{S}</math> / cm)</b> | 964       | 1165      | 1410      | 1750      | 2080      | 2430      | 2800      | 3260      |
| <b><math>\gamma</math>/ (mN/m)</b>                           | 48.5      | 48.0      | 47.5      | 47.1      | 46.7      | 46.4      | 46.0      | 45.6      |

**Table S7:** Raw data for Glycerol with 33% choline chloride

| <b>T/(°C)</b>                                                | <b>20</b> | <b>25</b> | <b>30</b> | <b>35</b> | <b>40</b> | <b>45</b> | <b>50</b> | <b>55</b> |
|--------------------------------------------------------------|-----------|-----------|-----------|-----------|-----------|-----------|-----------|-----------|
| <b><math>\eta</math> / (cP)</b>                              | 376       | 259       | 188       | 140       | 104       | 82        | 64        | 52        |
| <b><math>\sigma</math> / (<math>\mu\text{S}</math> / cm)</b> | 1047      | 1298      | 1636      | 1947      | 2320      | 2710      | 3110      | 3560      |
| <b><math>\gamma</math>/ (mN/m)</b>                           | 55.8      | 55.4      | 55.0      | 54.7      | 54.2      | 53.8      | 53.4      | 53.0      |

## Esterification Data

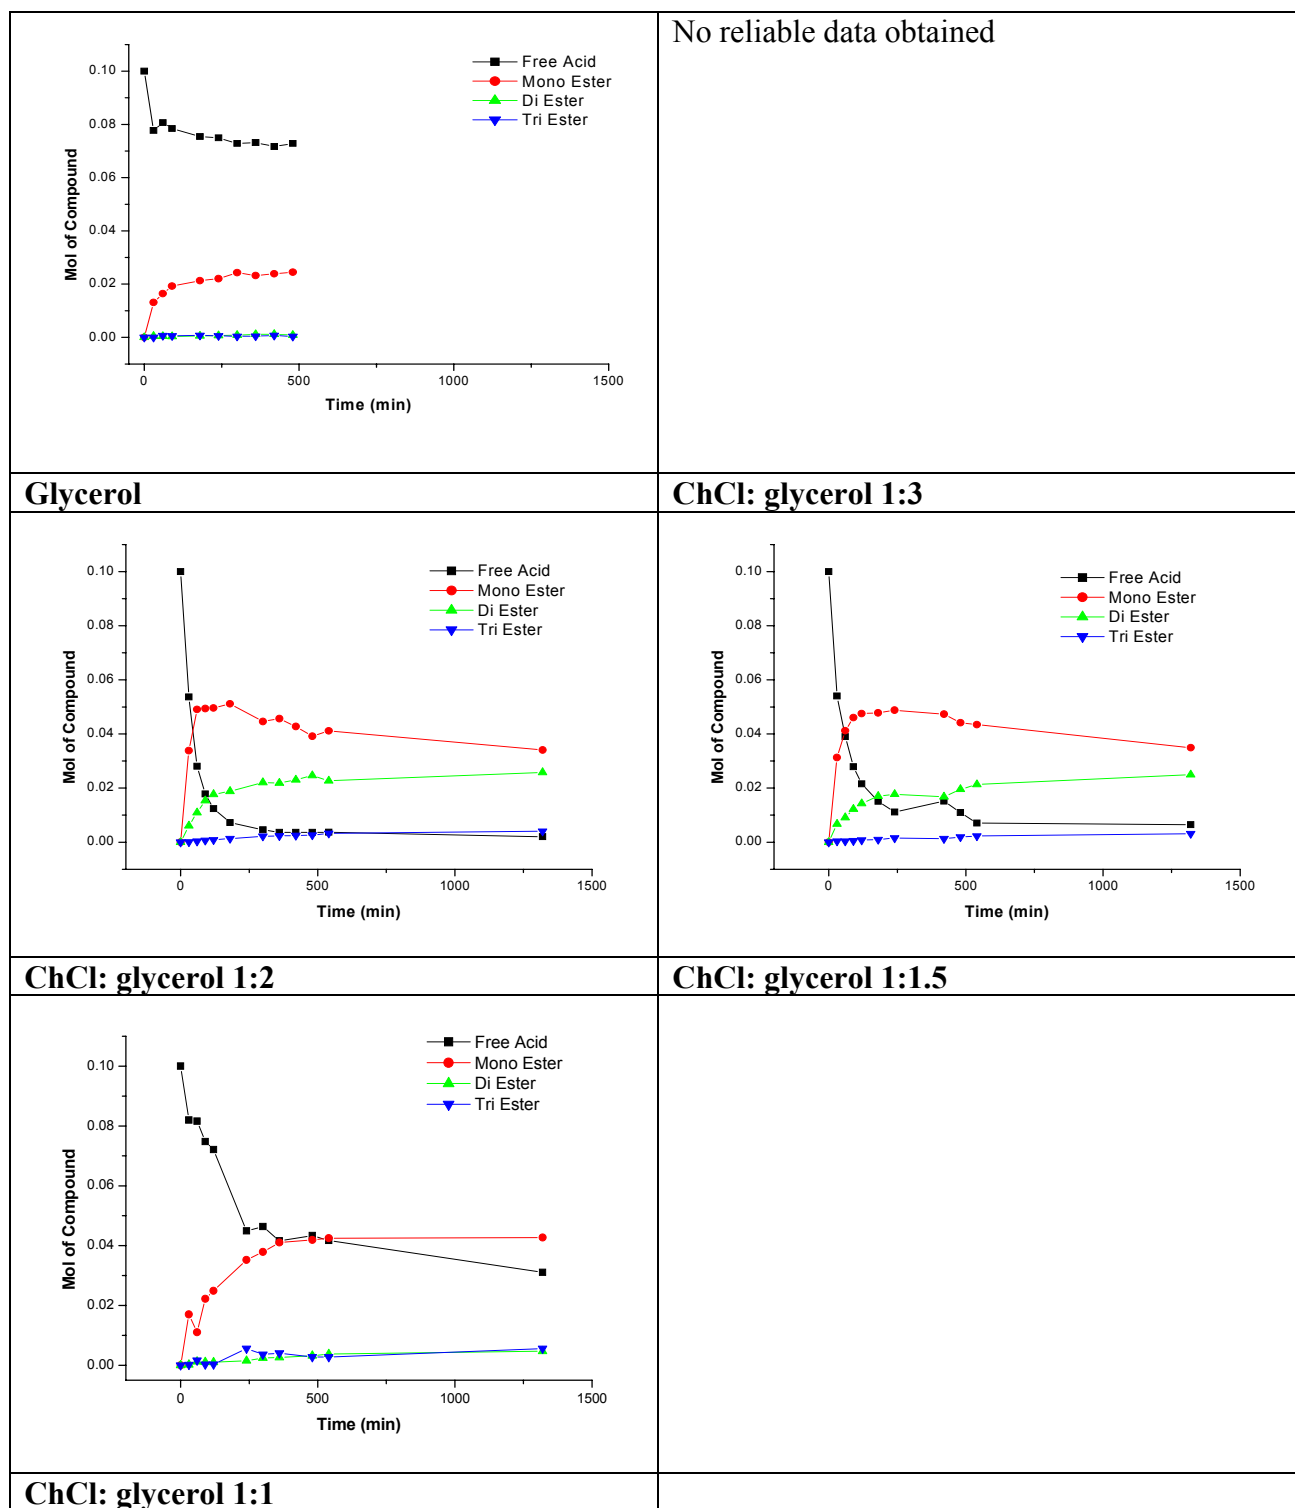

Figure S1: Esterification Data of 0.1 moles of Lauric Acid in Various ChCl: Glycerol DES Mixtures

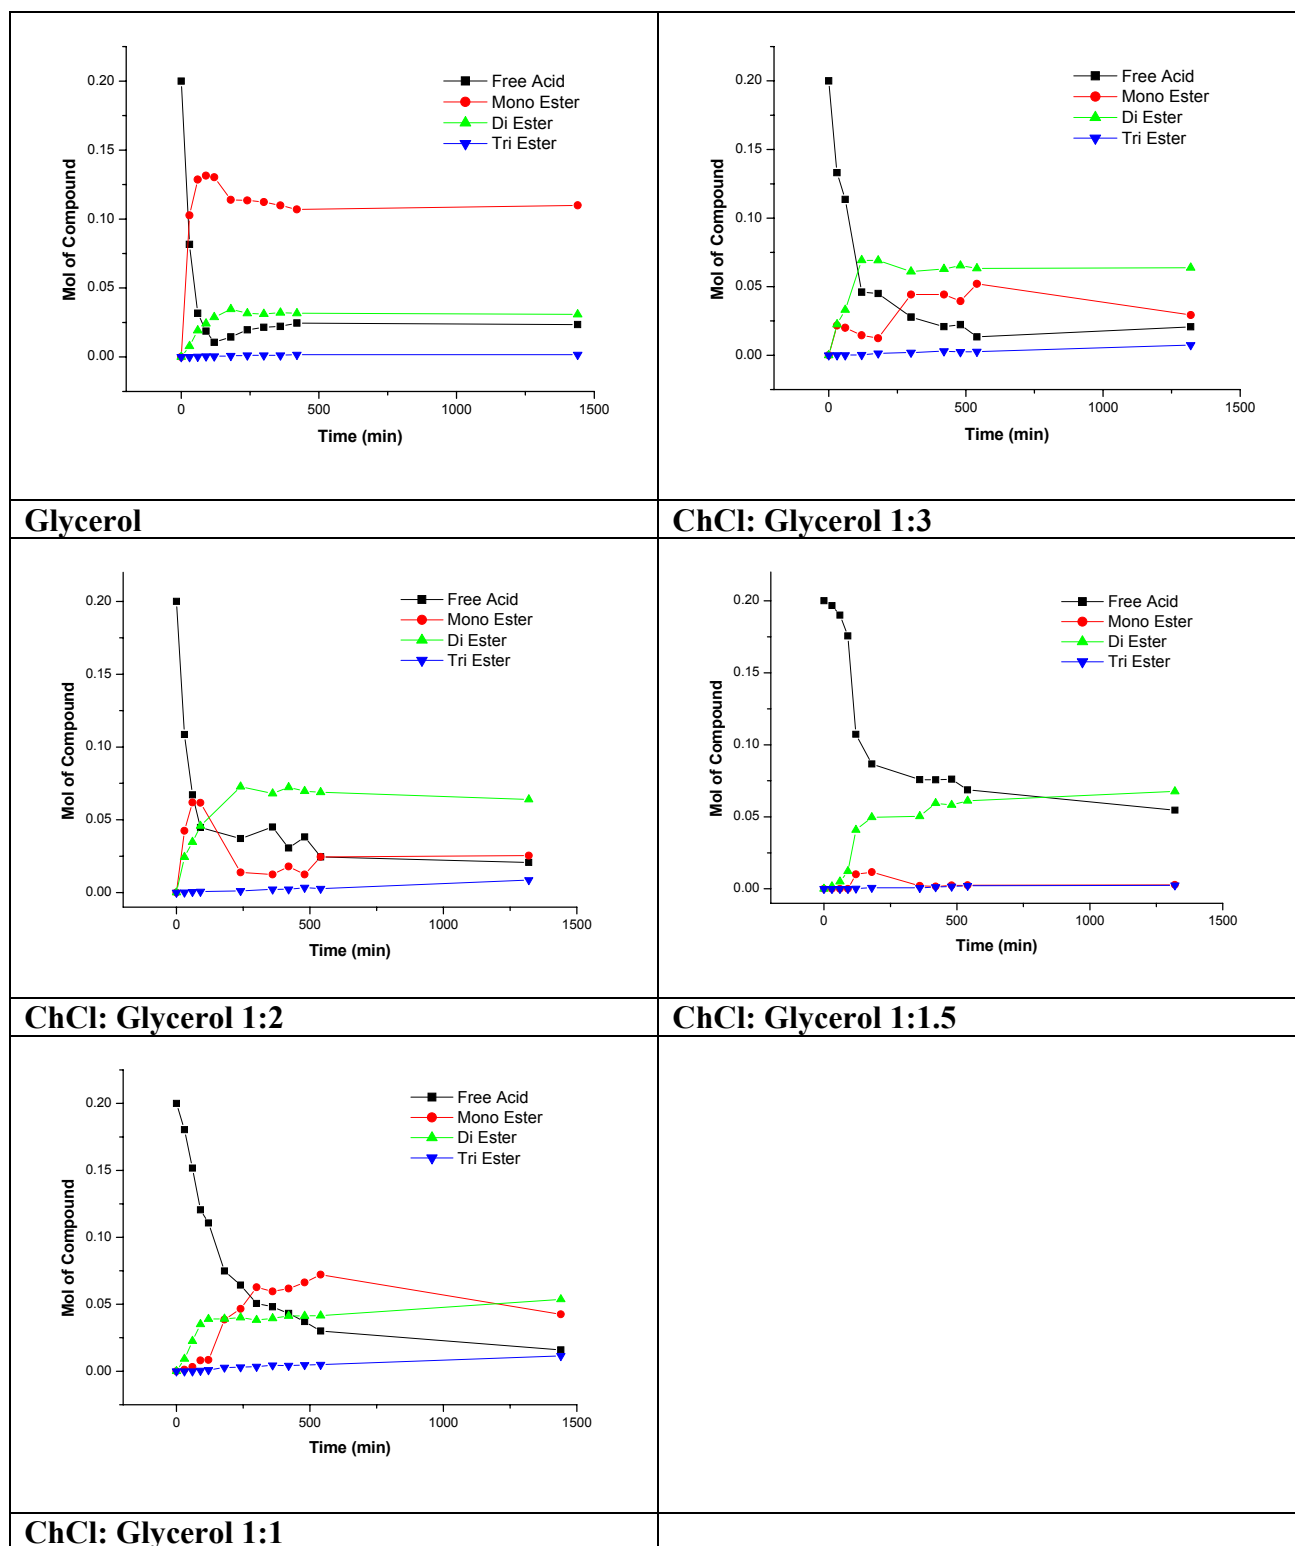

Figure S2: Esterification Data of 0.2 M Lauric Acid in Various ChCl: Glycerol DES Mixtures

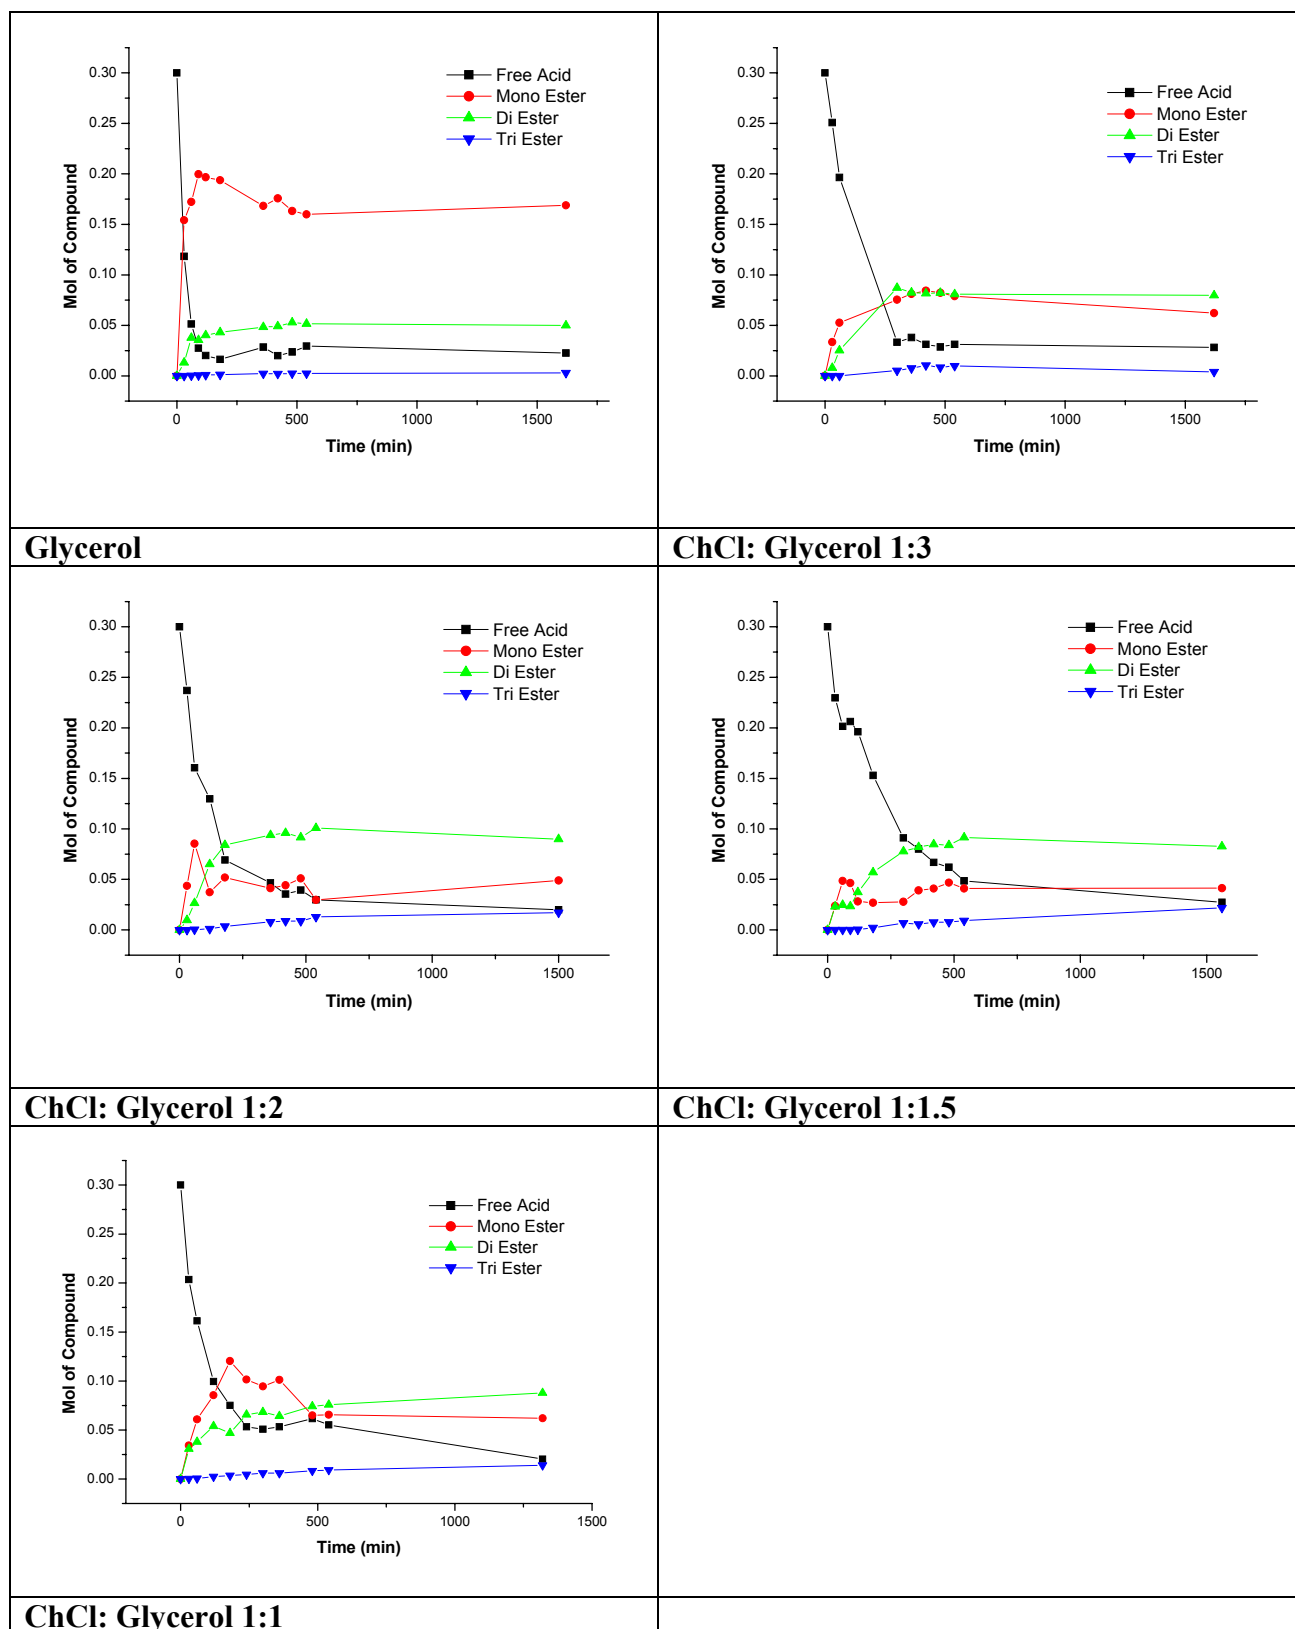

Figure S3: Esterification Data of 0.3 M Lauric Acid in Various ChCl: Glycerol DES Mixtures

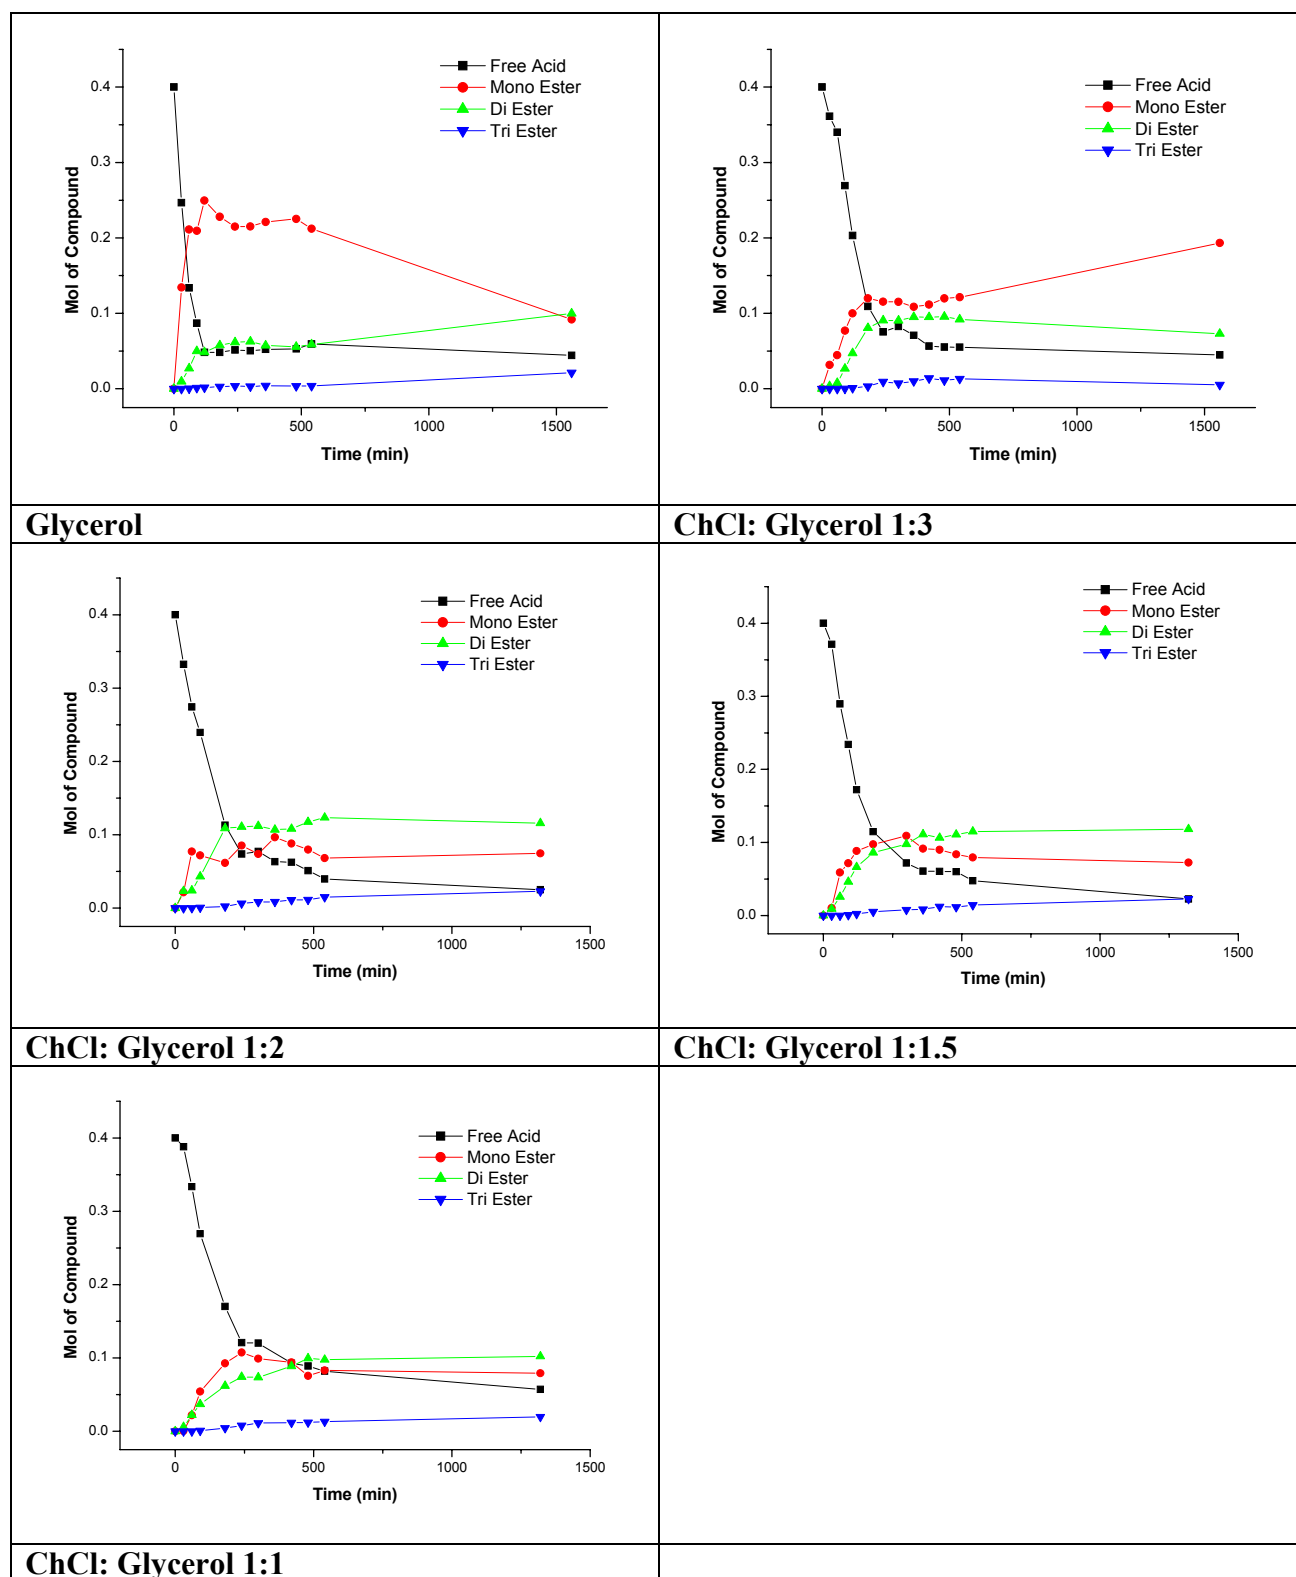

Figure S4: Esterification Data of 0.4 M Lauric Acid in Various ChCl: Glycerol DES Mixtures

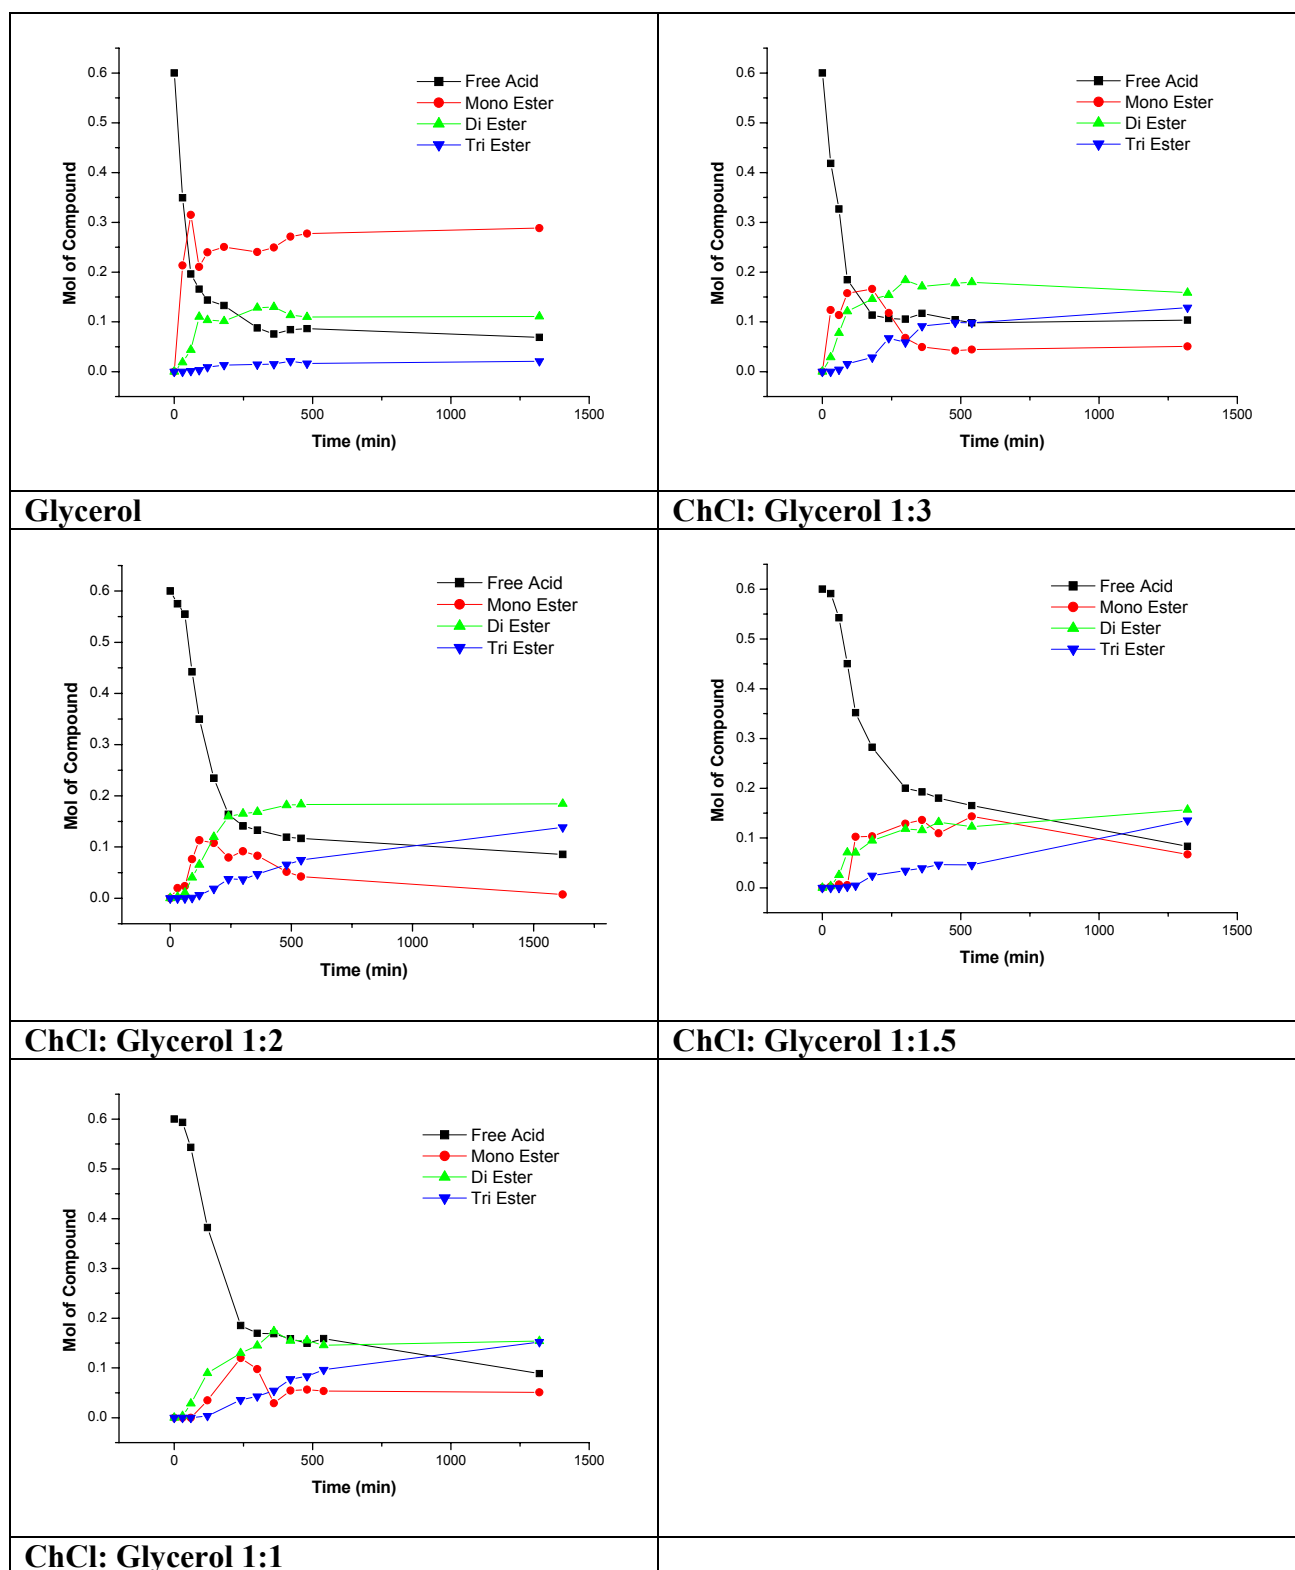

Figure S5: Esterification Data of 0.6 M Lauric Acid in Various ChCl: Glycerol DES Mixtures
